# Supplementary material for: Gαi/o-coupled Htr2c in the paraventricular nucleus of the hypothalamus antagonizes the anorectic effect of serotonin agents
Source: PubMed Central journal article supplement — Cell Rep. Author manuscript; Available in PMC 2021 Dec 1. (PMC8636014; doi:10.1016/j.celrep.2021.109997), 2021-11-16
Supplement: NIHMS1757877-supplement-1.pdf [file NIHMS1757877-supplement-1.pdf]

Cell Reports, Volume 37

## Supplemental information

### **G $\alpha_{i/o}$ -coupled *Htr2c* in the paraventricular nucleus of the hypothalamus antagonizes the anorectic effect of serotonin agents**

**Eun-Seon Yoo, Li Li, Lin Jia, Caleb C. Lord, Charlotte E. Lee, Shari G. Birnbaum, Claudia R. Vianna, Eric D. Berglund, Kathryn A. Cunningham, Yong Xu, Jong-Woo Sohn, and Chen Liu**

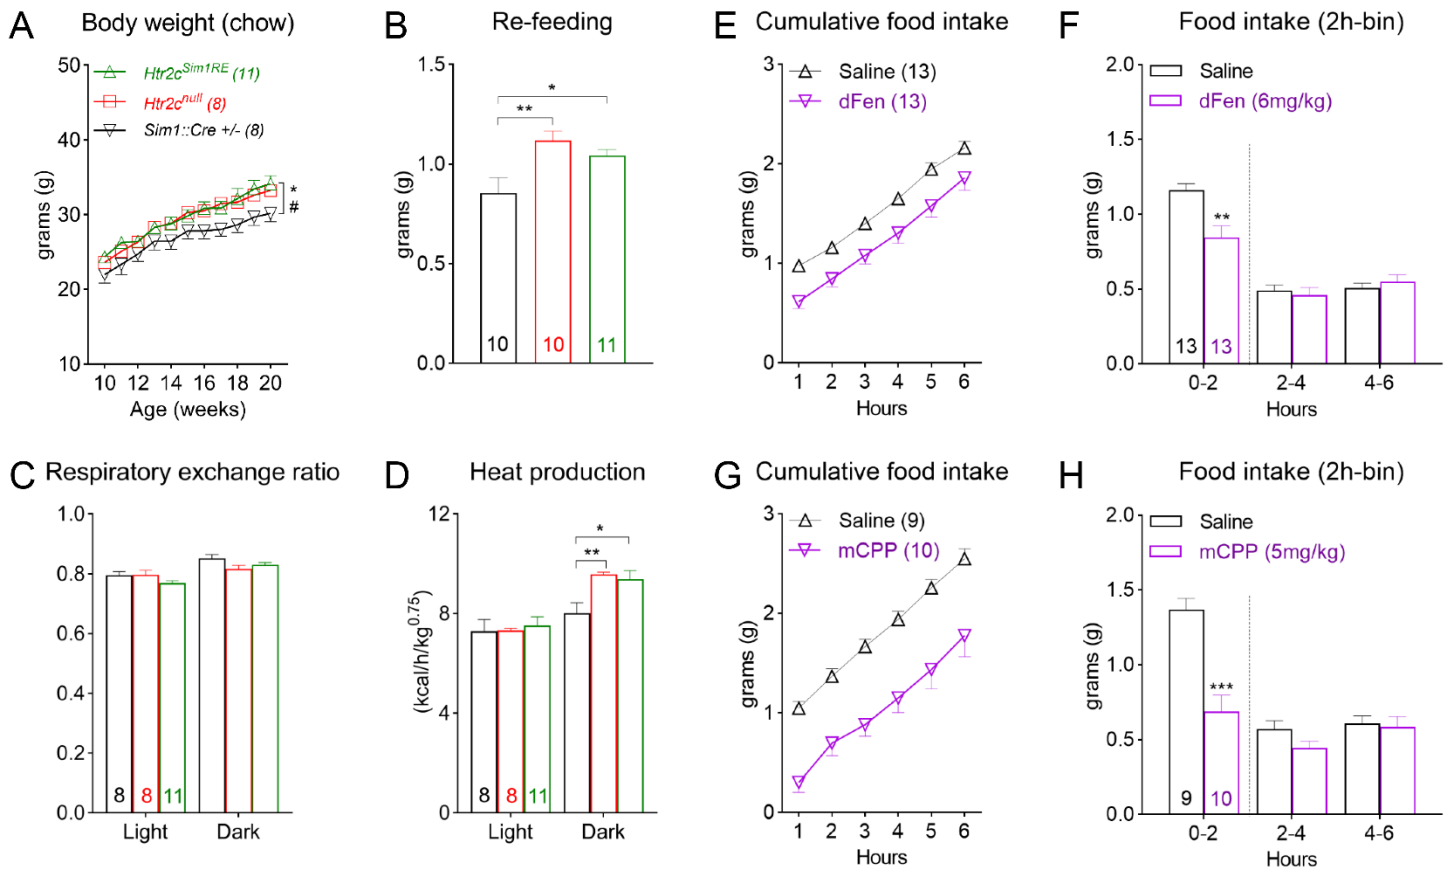

**Figure S1. Selective reactivation of *Htr2c* in *Sim1* neurons does not normalize defects in refeeding or energy expenditure of chow-fed *Htr2c* null mice.** Related to Figure 1. (A) Body weight curves in chow-fed male mice. \*  $p < 0.05$  between *Htr2c<sup>Sim1RE</sup>* and *Sim1::Cre +/-* mice; #  $p < 0.05$  between *Htr2c<sup>null</sup>* and *Sim1::Cre +/-* mice. (B) Food intake during the first two hours of re-feeding after an overnight fast. (C) Respiratory exchange ratio during light (6:00-18:00) and dark (18:00-6:00) phases of a day. (D) Heat production. (E) Cumulative food intake (six hours) after an i.p. dose of saline or dFen (6 mg/kg) in wild-type male mice. (F) Food intake in (E) is binned into two-hour time frames for the six hours. (G) Cumulative food intake (six hours) after an i.p. dose of saline or mCPP (5 mg/kg) in wild-type male mice. (H) Food intake in (G) is binned into two-hour time frames for the six hours. Experiments in E-F were conducted in chow-fed mice. Values represent mean  $\pm$  SEM;  $n=8-13$ . Two-way ANOVA with Tukey's *post hoc* tests in A, C, D, E-H. One-way ANOVA with Tukey's *post hoc* test in B. \* $p < 0.05$ , \*\* $p < 0.01$ , and \*\*\* $p < 0.001$ .

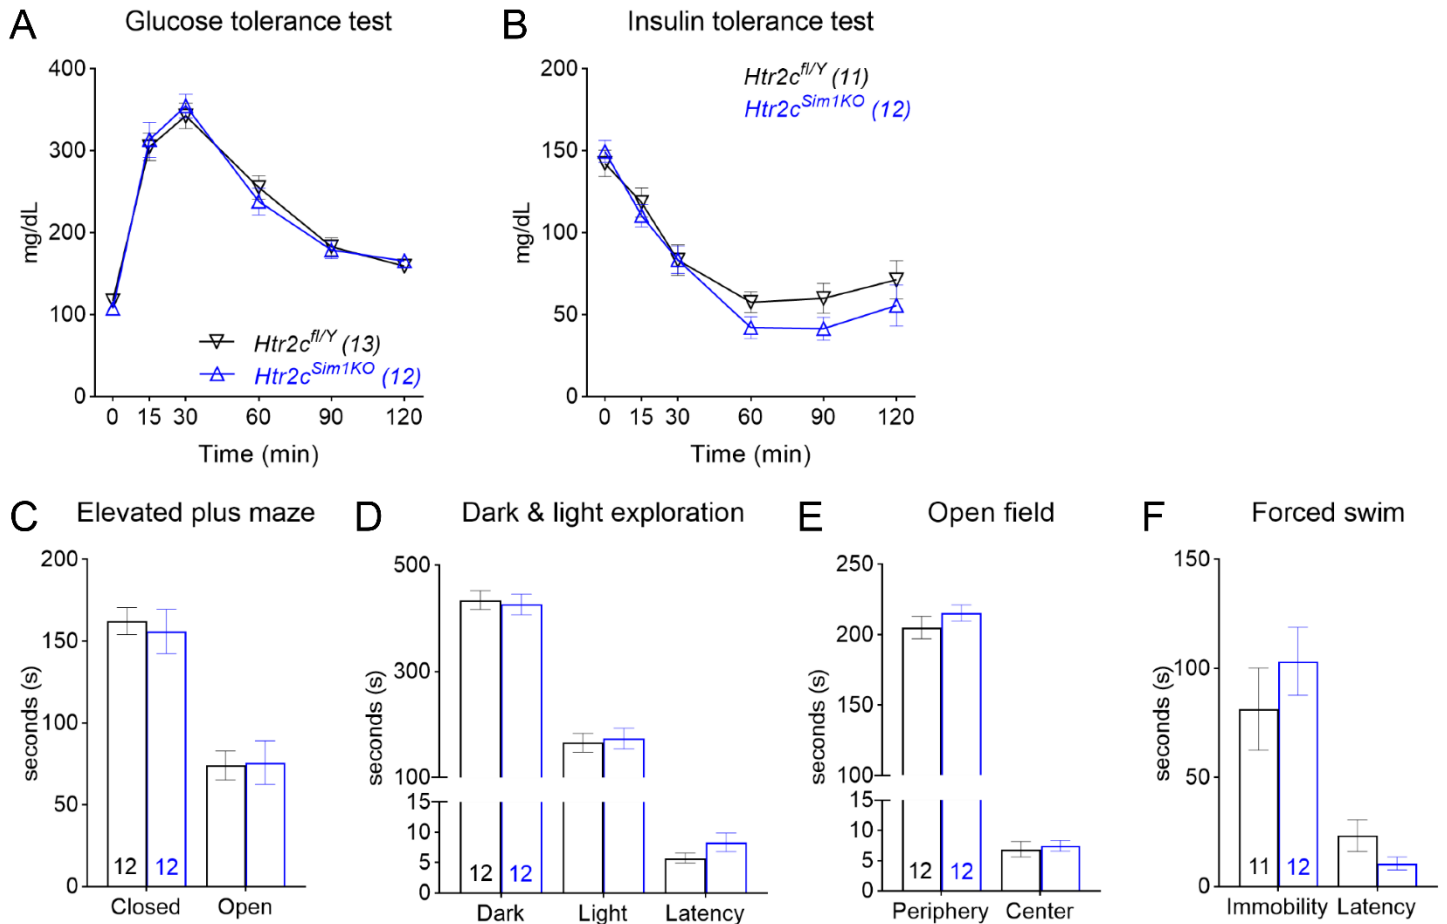

**Figure S2. Deletion of *Htr2c* in *Sim1* neurons does not affect glucose homeostasis, anxiety, or depressive-like behaviors in male mice.** Related to Figure 2. (A) Glucose tolerance test. (B) Insulin tolerance test. (C) Elevated plus-maze,  $F(1, 22)=0.07$ ,  $p=0.79$ . (D) Dark light exploration,  $F(1, 22)=2.21$ ,  $p=0.15$ . (E) Open field,  $F(1, 22)=0.81$ ,  $p=0.38$ . (F) Forced swim test,  $F(1, 21)=1.31$ ,  $p=0.26$ . Values represent mean  $\pm$  SEM;  $n=11-13$ , two-way ANOVA with Tukey's *post hoc* tests.

*Htr2c*<sup>Cre+</sup> ; *R26R*<sup>tdTomato+</sup>

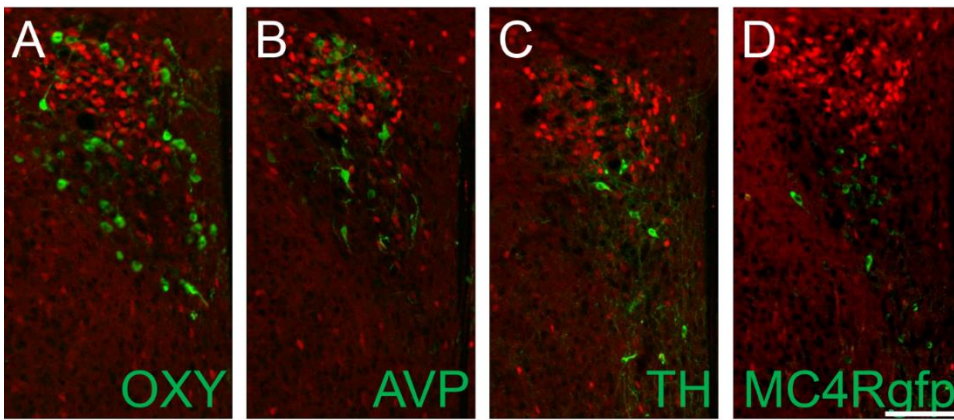

*Htr2c*<sup>Cre+</sup> ; *R26R*<sup>tdTomato+</sup>

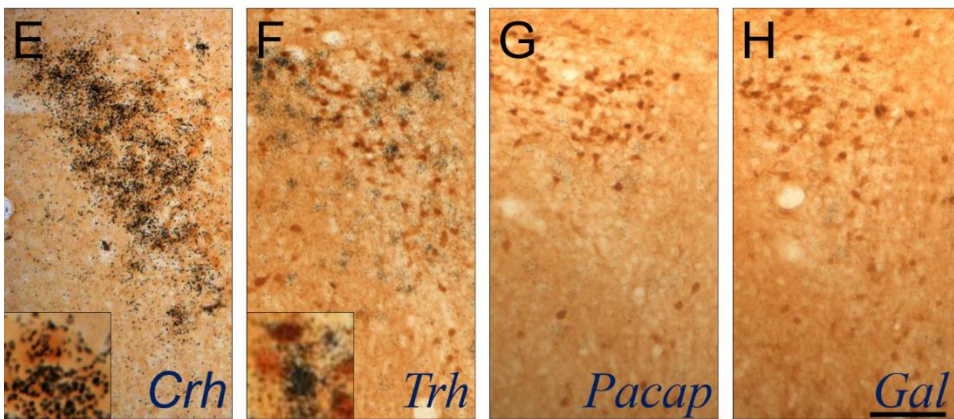

**Figure S3. Fate mapping of *Htr2c* expressing neurons in the PVH.** Related to Figure 3 (A-D) Double immunofluorescence between tdTomato reporter (red) and proteins (green) for OXY, AVP, TH, and MC4R-GFP in *Htr2c*<sup>Cre+</sup>; *tdTomato*<sup>+</sup> mice. (E-H) Dual-label of S<sup>35</sup>-labelled RNA *in situ* hybridization and immunohistochemistry between tdTomato protein (brown) and mRNAs (blue) for *Crh*, *Trh*, *Pacap*, and *Gal* in *Htr2c*<sup>Cre+</sup>; *tdTomato*<sup>+</sup> mice. Scale bars are 50  $\mu$ m.

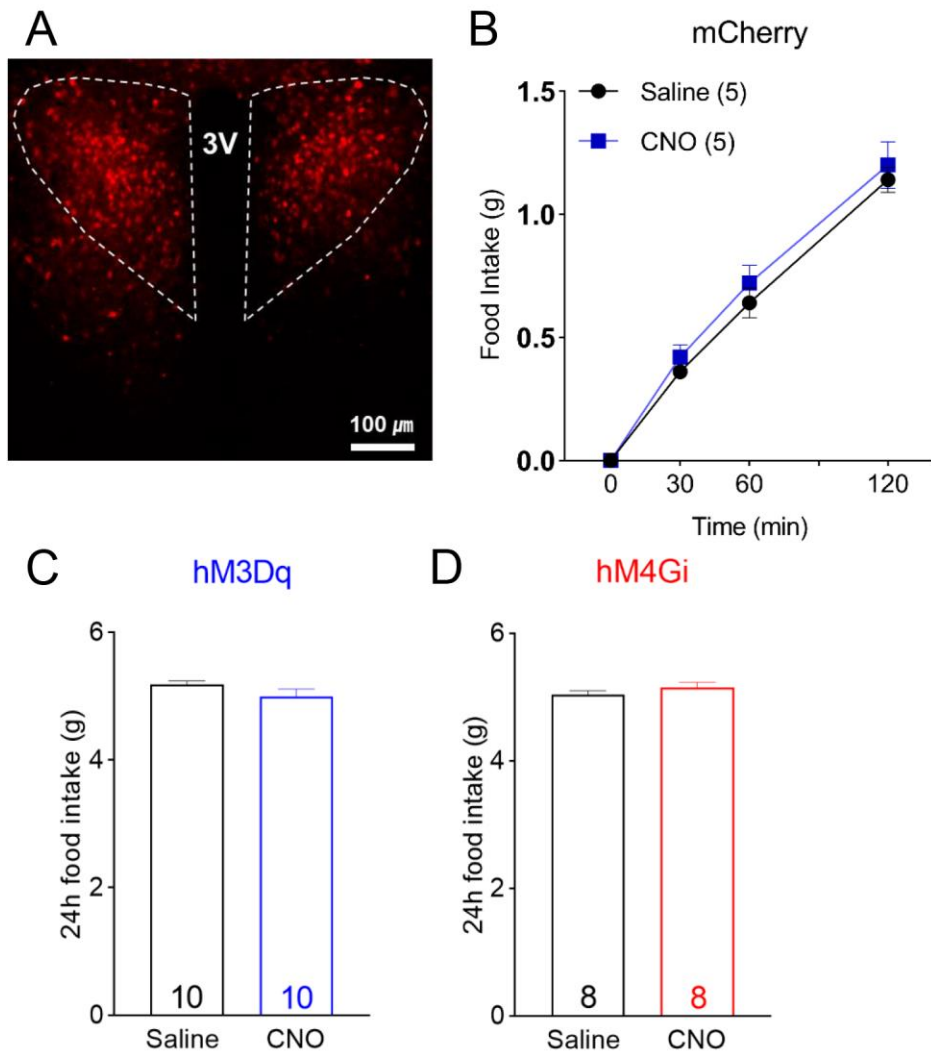

**Figure S4. CNO alone did not alter food intake in *Htr2c<sup>Cre+</sup>* male mice.** Related to Figure 3 (A) Immunofluorescence for mCherry. (B) Refeeding in *Htr2c<sup>Cre+</sup>* mice that received the control virus (AAV-DIO-mCherry) injections in the PVH. CNO treatment (1 mg/kg) did not change food intake in these mice. (C and D). Refeeding during twenty-four hours after saline or CNO treatment in *Htr2c<sup>Cre+</sup>* mice that received either hM3Dq (C) or hM4Gi DREADD constructs. Two-way ANOVA with Sidak's *post hoc* tests are in B, paired t-test in C and D. Scale bar in A is 100  $\mu$ m.

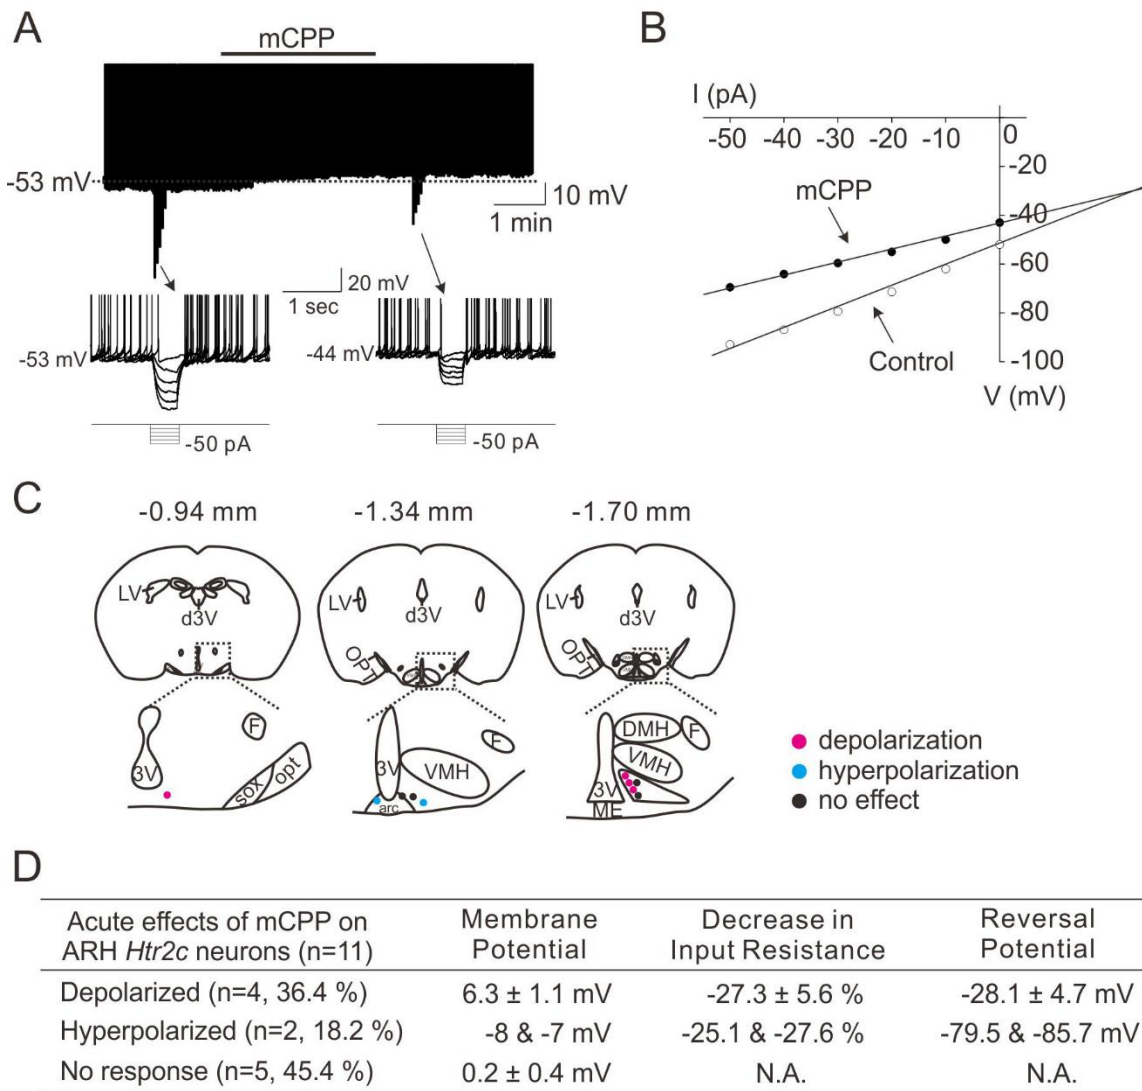

**Figure S5. mCPP activates a subpopulation of ARH *Htr2c* neurons.** Related to Figure 4. (A) Bath application of mCPP caused a prompt depolarization of membrane potential. Downward deflections shown in the trace represent voltage responses to current steps, which are shown as insets below. (B) Current-voltage (IV) relationship before (control) and after (mCPP) application. (C) A schematic that summarizes the location of the recorded *Htr2c* neurons within the ARH. (D) A table that summarizes the number, percentage, and electrophysiological characteristics, of responses to mCPP treatment.

| Oligonucleotides                                                                                                                                                                                |                             |     |
|-------------------------------------------------------------------------------------------------------------------------------------------------------------------------------------------------|-----------------------------|-----|
| <i>Htr2c</i> probe primer set, F:<br>GAATTAACCCTCACTAAAGGGTGAA<br>ACAATACTGTTAACCTCCCAAT, R:<br>GTAATACGACTCACTATAGGGCATA<br>AAGAATTGCAAGCAGAGACAG;                                             | Integrated DNA Technologies | N/A |
| <i>Galanin</i> probe primer set, F:<br>GAATTAACCCTCACTAAAGGGACCG<br>AGAGAGCCTTGATCCT, R:<br>GTAATACGACTCACTATAGGGCGCT<br>TGAGGAGTTGGCAGAAG;                                                     | Integrated DNA Technologies | N/A |
| <i>Trh</i> probe primer set, F:<br>GAATTAACCCTCACTAAAGGGGAGG<br>GGAGATTTGGGAGAAG, R:<br>GTAATACGACTCACTATAGGGCCCA<br>GTGAAGGGACTGGGATA;                                                         | Integrated DNA Technologies | N/A |
| <i>Crh</i> probe primer set, F:<br>GAATTAACCCTCACTAAAGGGCCAA<br>GGGAGGAGAAGAGAGC, R:<br>GTAATACGACTCACTATAGGGCGGT<br>GGAAGGTGAGATCCAGA;                                                         | Integrated DNA Technologies | N/A |
| <i>Pacap</i> probe primer set, F:<br>GAATTAACCCTCACTAAAGGGAATG<br>ACTTGGGGAATTGCTG, R:<br>GTAATACGACTCACTATAGGGCGCA<br>TGAACAGCACTGGAGAA                                                        | Integrated DNA Technologies | N/A |
| <i>Htr2c::Cre</i> genotyping primer set, CL-<br>9631: TTTGTGGGAAGGCCTGTAAC;<br>CL-10057:<br>GGAGTGGGGACTTTCCTAC; CL-<br>R309: TCCCTCACATCCTCAGGTTC                                              | Integrated DNA Technologies | N/A |
| <i>Htr2c</i> flox genotyping primer set, <i>Htr2c</i> -<br>flox1:<br>TGTCATCTCTCAATGCACAAAA;<br><i>Htr2c</i> -flox2:<br>GCCACTAGAGGGCAACAATAA;<br><i>Htr2c</i> -flox3:<br>GCATCAGATCTCCTGGGACT; | Integrated DNA Technologies | N/A |
| <i>Htr2c</i> RN genotyping primer set, <i>Htr2c</i> -<br>RN 1:<br>AAGAGCTACAGGAAGGCAGGTCA;<br><i>Htr2c</i> -RN 2:<br>AGGCTTTAGTGACCTCCCATGA;<br><i>Htr2c</i> -RN 3:<br>CGGAAGAGAAGGACCTGGATAG;  | Integrated DNA Technologies | N/A |

**Table S1. Oligonucleotide information**, related to STAR Methods.
